# Supplementary material for: Trans-eQTLs Can Be Used to Identify Tissue-Specific Gene Regulatory Networks
Source: Preprints.org preprint supplement (doi:10.20944/preprints202401.0546.v2), 2024-04-08
Supplement: Supplementary file 1 [file supplementary]

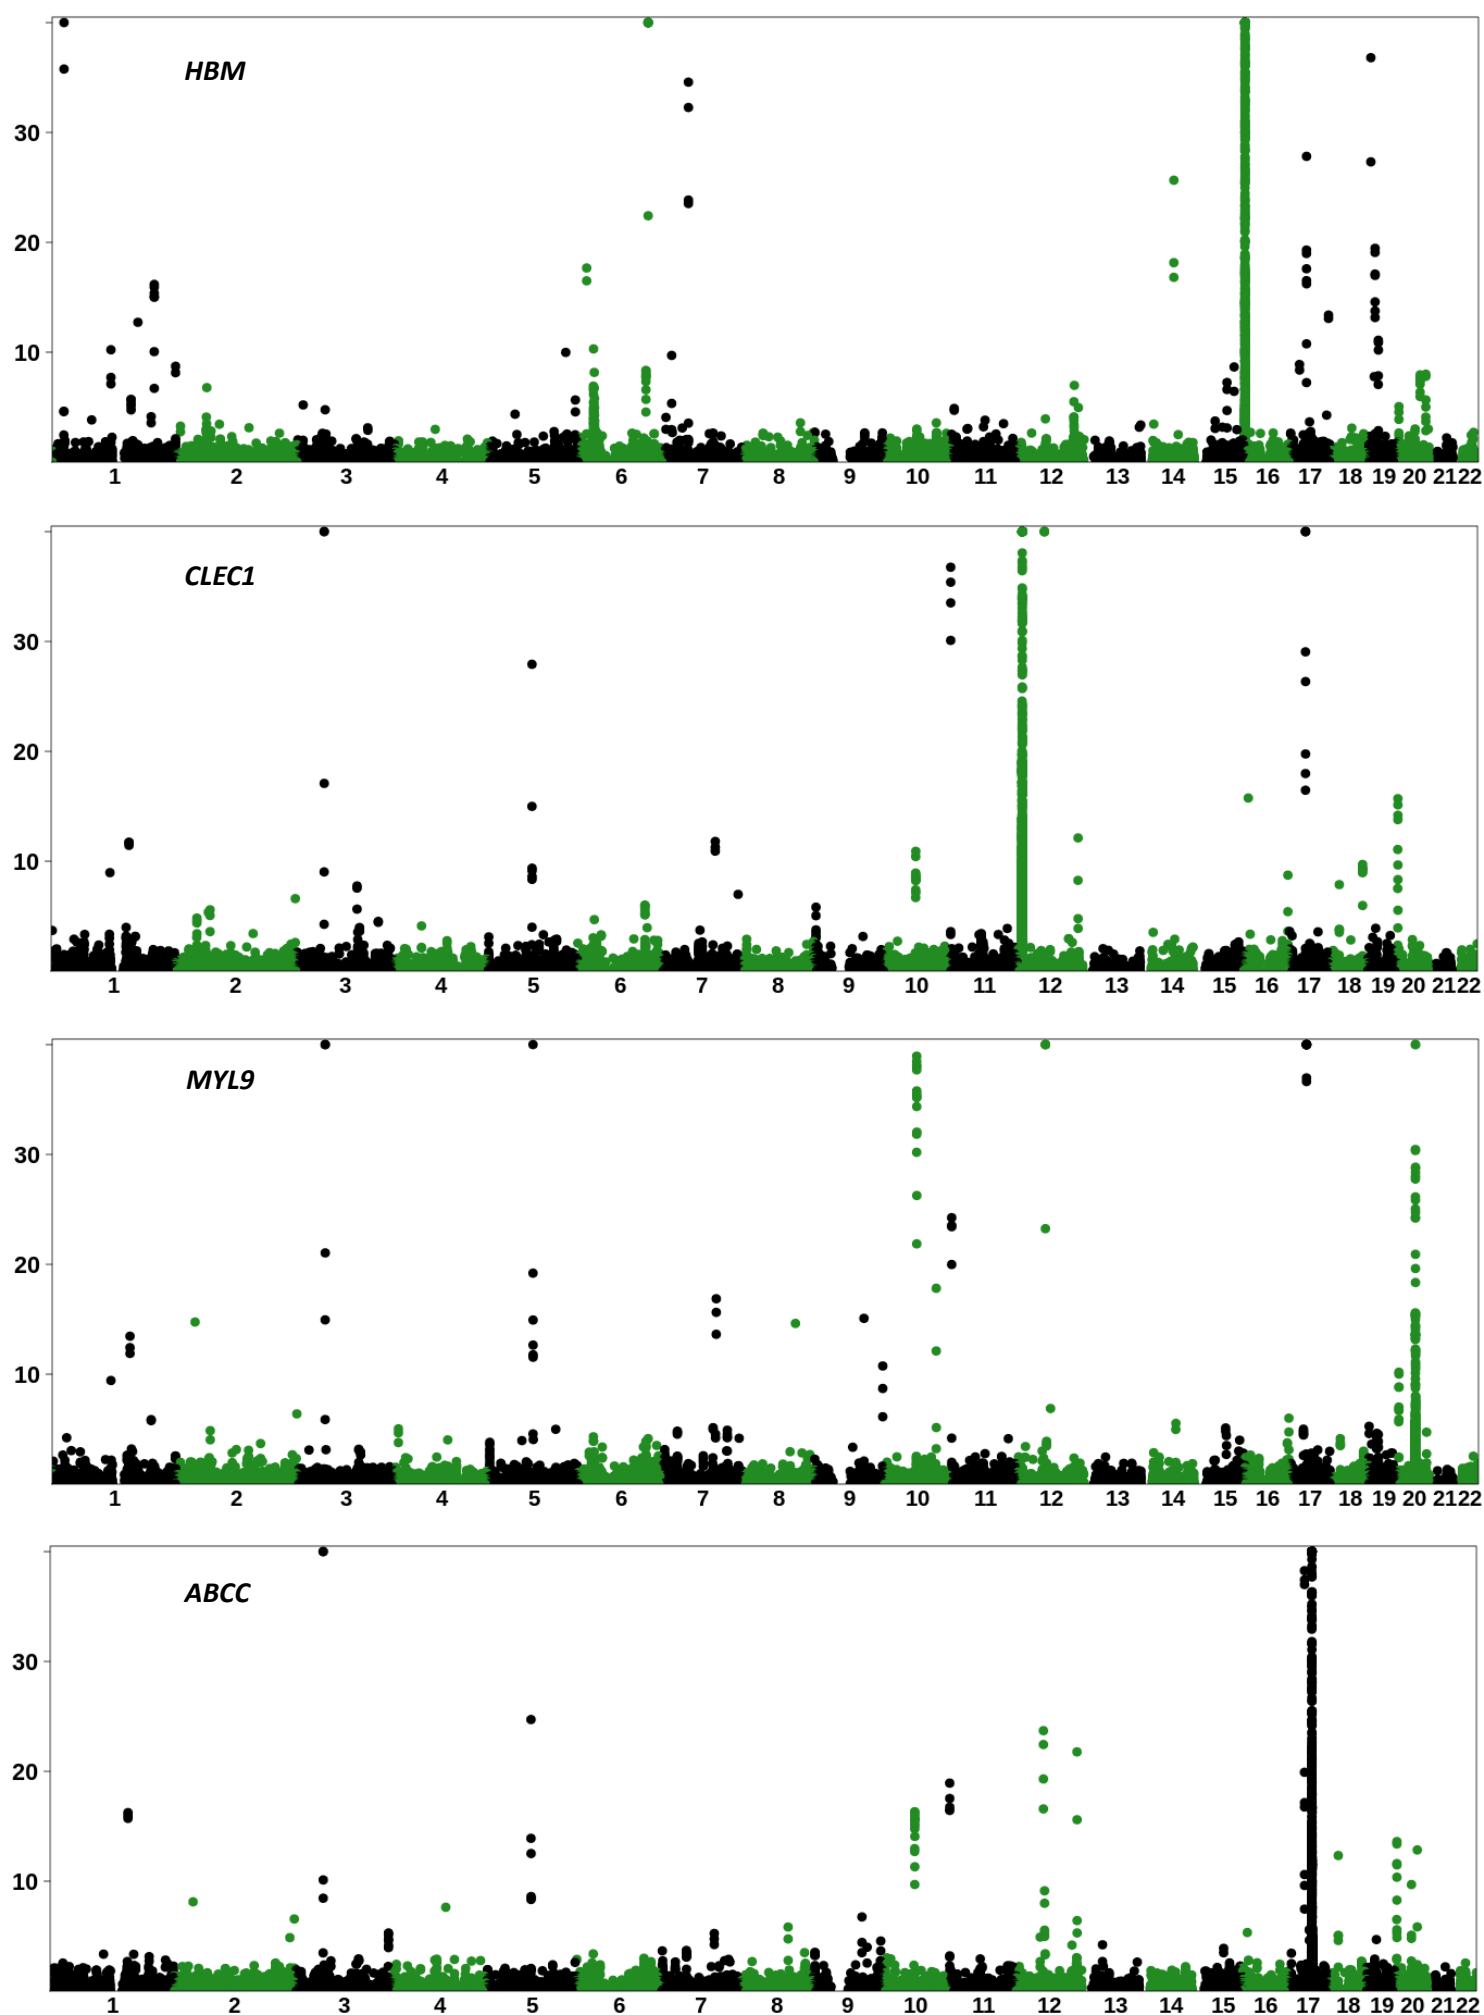

**Figure S1. Manhattan plots summarizing distribution of eQTLs.** X-axis indicates positions (bp) by chromosomes and y-axis indicates the magnitude of associations i.e.  $-\log_{10}(P\text{-value})$ . Plots were generated for genes with highest number of trans-eQTLs including *HBM*, *CLEC1*, *MYL9*, and *ABCC*. eQTLs on adjacent chromosomes are colored differently and the y-axis has been capped at  $P=1 \times 10^{-40}$  to aid viewing.
