# Supplementary material for: Trans-eQTLs Can Be Used to Identify Tissue-Specific Gene Regulatory Networks
Source: Preprints.org preprint supplement (doi:10.20944/preprints202401.0546.v2), 2024-04-08
Supplement: Supplementary file 2 [file supplementary]

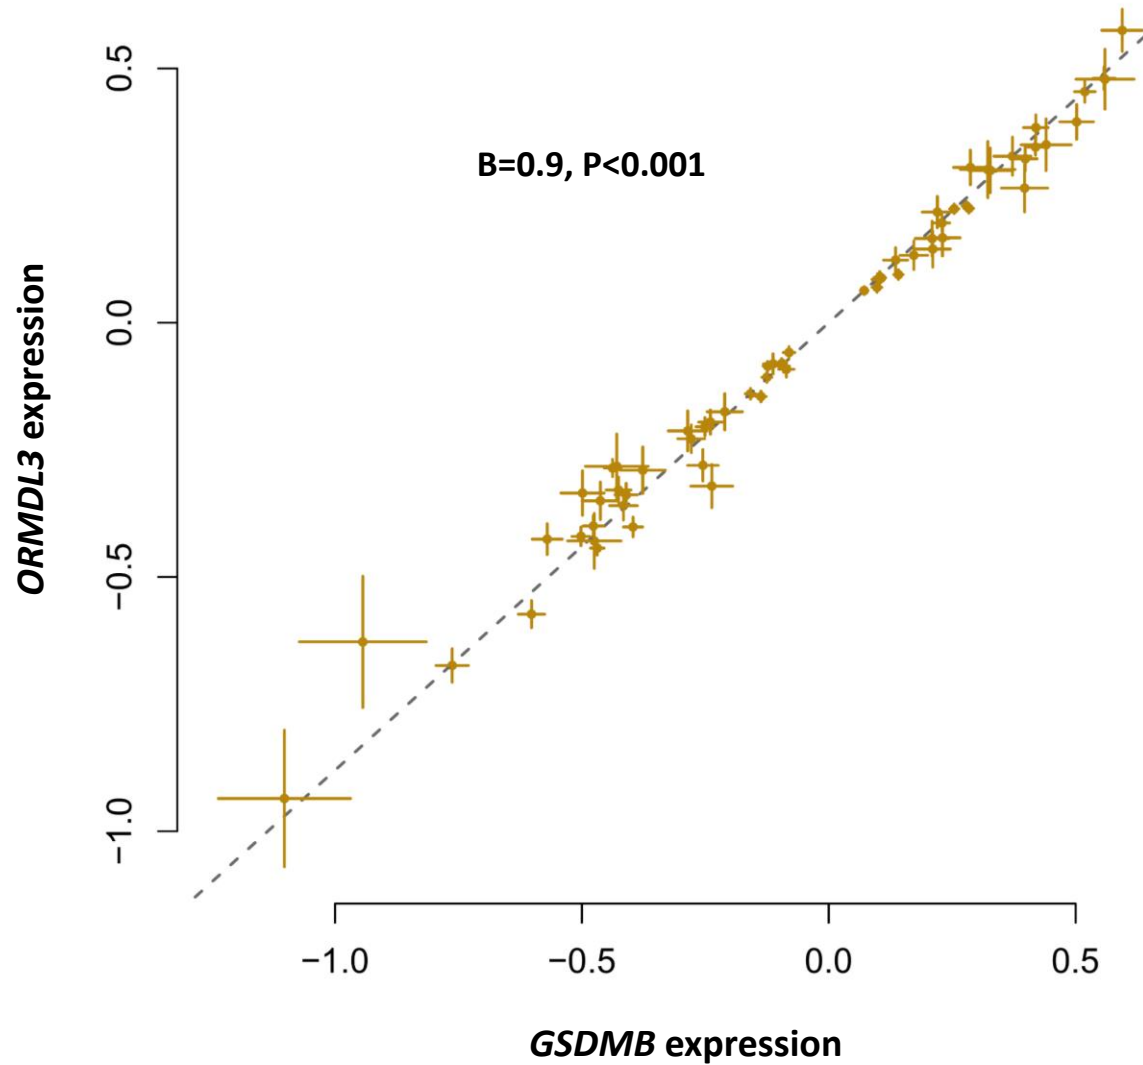

**Figure S3. *GSDMB* and *ORMDL3* are correlated with regard to their eQTLs.** Independent eQTLs ( $r^2<0.05$ ) that are shared between *GSDMB* and *ORMDL3* were selected, and a plot was generated based on their effect sizes. Therefore, each point on the plot represents an eQTL. The x-value of the eQTL is its  $\beta$  effect size on the expression of *GSDMB*, and the horizontal error bar represents the standard error around its  $\beta$ . The y-value of the SNP is its  $\beta$  effect size on the expression of *ORMDL3*, and the vertical error bar represents the standard error around its  $\beta$ . The dashed line represents the line of best fit (a line with the intercept of 0 and the slope of  $B=0.9$ ).
