# Supplementary material for: Trans-eQTLs Can Be Used to Identify Tissue-Specific Gene Regulatory Networks
Source: Preprints.org preprint supplement (doi:10.20944/preprints202401.0546.v2), 2024-04-08
Supplement: Supplementary file 4 [file supplementary]

Archive with 4 entries (4 files):
- Supplementary_files/Figure S1.pdf
- Supplementary_files/Figure S2.pdf
- Supplementary_files/Figure S3.pdf
- Supplementary_files/Supplementary Tables.xlsx
